# Supplementary material for: Neural heterogeneity promotes robust learning
Source: PubMed Central journal article supplement (PMC8490404; doi:10.1038/s41467-021-26022-3), 2021-10-04
Supplement: 41467_2021_26022_MOESM1_ESM.pdf [file 41467_2021_26022_MOESM1_ESM.pdf]

# Supplementary Information for Neural heterogeneity promotes robust learning

|          |                                                                                              |           |
|----------|----------------------------------------------------------------------------------------------|-----------|
| <b>1</b> | <b>Supplementary Tables</b>                                                                  | <b>2</b>  |
| 1.1      | Heterogeneity on other spiking neuron hyperparameters . . . . .                              | 2         |
| <b>2</b> | <b>Supplementary Figures</b>                                                                 | <b>3</b>  |
| 2.1      | Membrane time constant distribution consistency across trials . . . . .                      | 3         |
| 2.2      | Synaptic time constant distribution consistency across trials . . . . .                      | 4         |
| 2.3      | Confusion matrices DVS-gesture dataset . . . . .                                             | 5         |
| 2.4      | Grid search of parameters . . . . .                                                          | 6         |
| 2.5      | All trials Fashion-MNIST . . . . .                                                           | 6         |
| 2.6      | Robustness under other time constant distributions . . . . .                                 | 7         |
| 2.7      | Visualisation of temporal structure of DVS128 gesture dataset samples . . . . .              | 8         |
| 2.8      | Membrane time constant distribution learned from different initialisation . . . . .          | 9         |
| 2.9      | Synaptic time constant distribution learned from different initialisation . . . . .          | 10        |
| 2.10     | Membrane time constant fitted to Gamma and Log-normal distributions . . . . .                | 11        |
| 2.11     | Synaptic time constant fitted to Gamma and Log-normal distributions . . . . .                | 12        |
| 2.12     | Experimentally observed time constant fitted to Gamma and Log-normal distributions . . . . . | 13        |
| 2.13     | Performance on Augmented SHD dataset . . . . .                                               | 14        |
|          | <b>Supplementary References</b>                                                              | <b>15</b> |

# 1 Supplementary Tables

## 1.1 Heterogeneity on other spiking neuron hyperparameters

|                      | <b>HomInit-StdTr</b> $\tau_m$ and $\tau_s$ |                |                | <b>HetInit-HetTr</b> $\tau_m$ and $\tau_s$ |                |                |
|----------------------|--------------------------------------------|----------------|----------------|--------------------------------------------|----------------|----------------|
|                      | $U_{th}$                                   | $U_0$          | $U_r$          | $U_{th}$                                   | $U_0$          | $U_r$          |
| <b>HomInit-StdTr</b> | $72.8 \pm 3.4$                             | $72.8 \pm 3.4$ | $72.8 \pm 3.4$ | $78.9 \pm 2.0$                             | $78.9 \pm 2.0$ | $78.9 \pm 2.0$ |
| <b>HetInit-StdTr</b> | $71.1 \pm 2.3$                             | $69.9 \pm 2.3$ | $70.8 \pm 3.3$ | $79.2 \pm 2.9$                             | $74.8 \pm 4.9$ | $79.1 \pm 2.7$ |
| <b>HomInit-HetTr</b> | $73.7 \pm 2.8$                             | $71.6 \pm 3.1$ | $70.5 \pm 3.7$ | $79.1 \pm 1.8$                             | $76.1 \pm 3.3$ | $76.4 \pm 2.7$ |
| <b>HetInit-HetTr</b> | $73.2 \pm 2.8$                             | $72.0 \pm 2.6$ | $69.4 \pm 3.8$ | $79.2 \pm 2.8$                             | $74.9 \pm 6.6$ | $75.4 \pm 6.6$ |

**Supplementary Table 1:** Performance comparison among different RSNN configurations on SHD testing set. The configuration for  $\tau_m$  and  $\tau_s$  was used as specified in the top row. Initialisation and training schemes were applied only for the parameter in its corresponding column

## 2 Supplementary Figures

### 2.1 Membrane time constant distribution consistency across trials

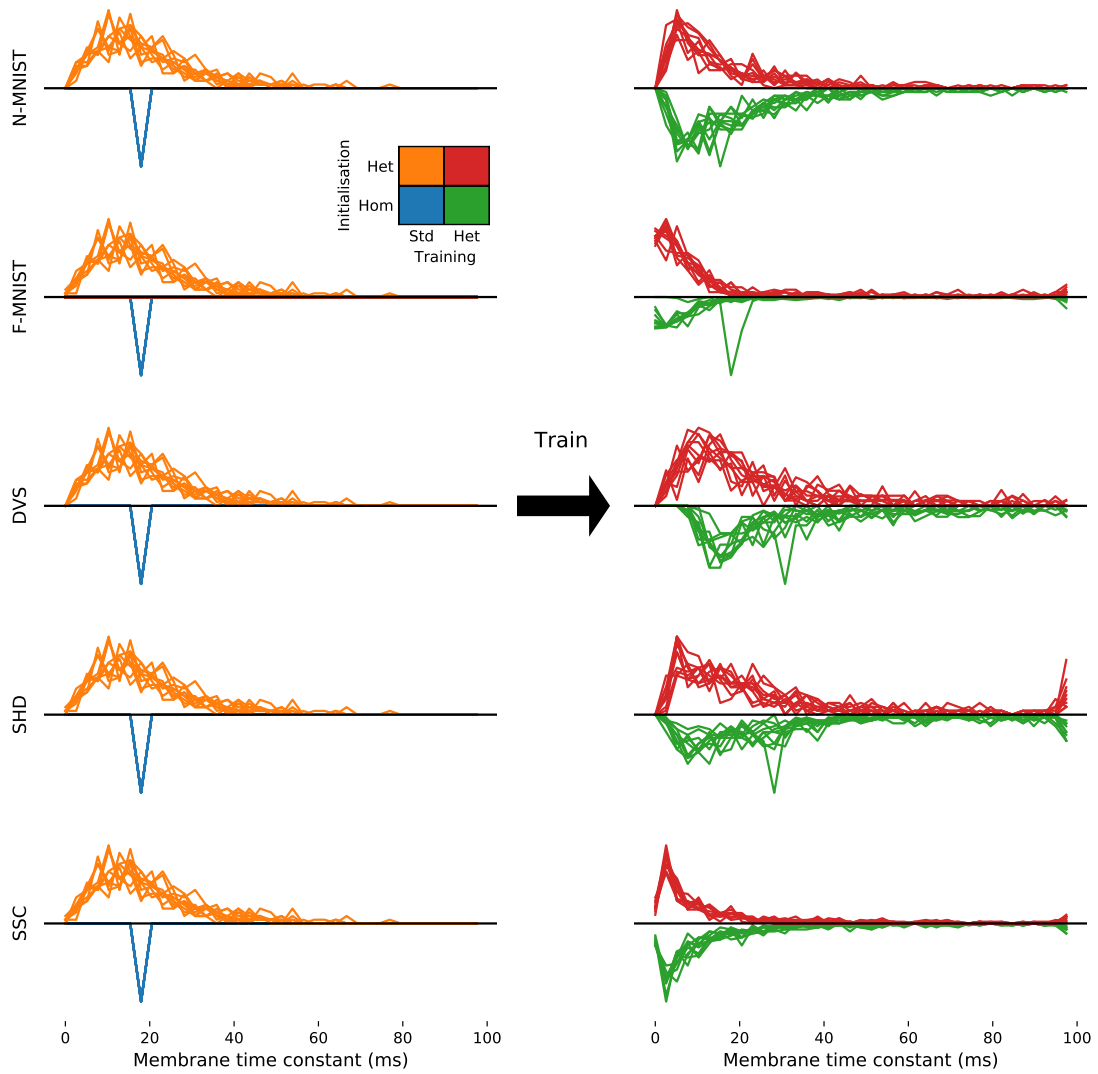

**Supplementary Figure 1:** Breakdown of membrane time constant distribution for each trial for consistency checking on each dataset.

## 2.2 Synaptic time constant distribution consistency across trials

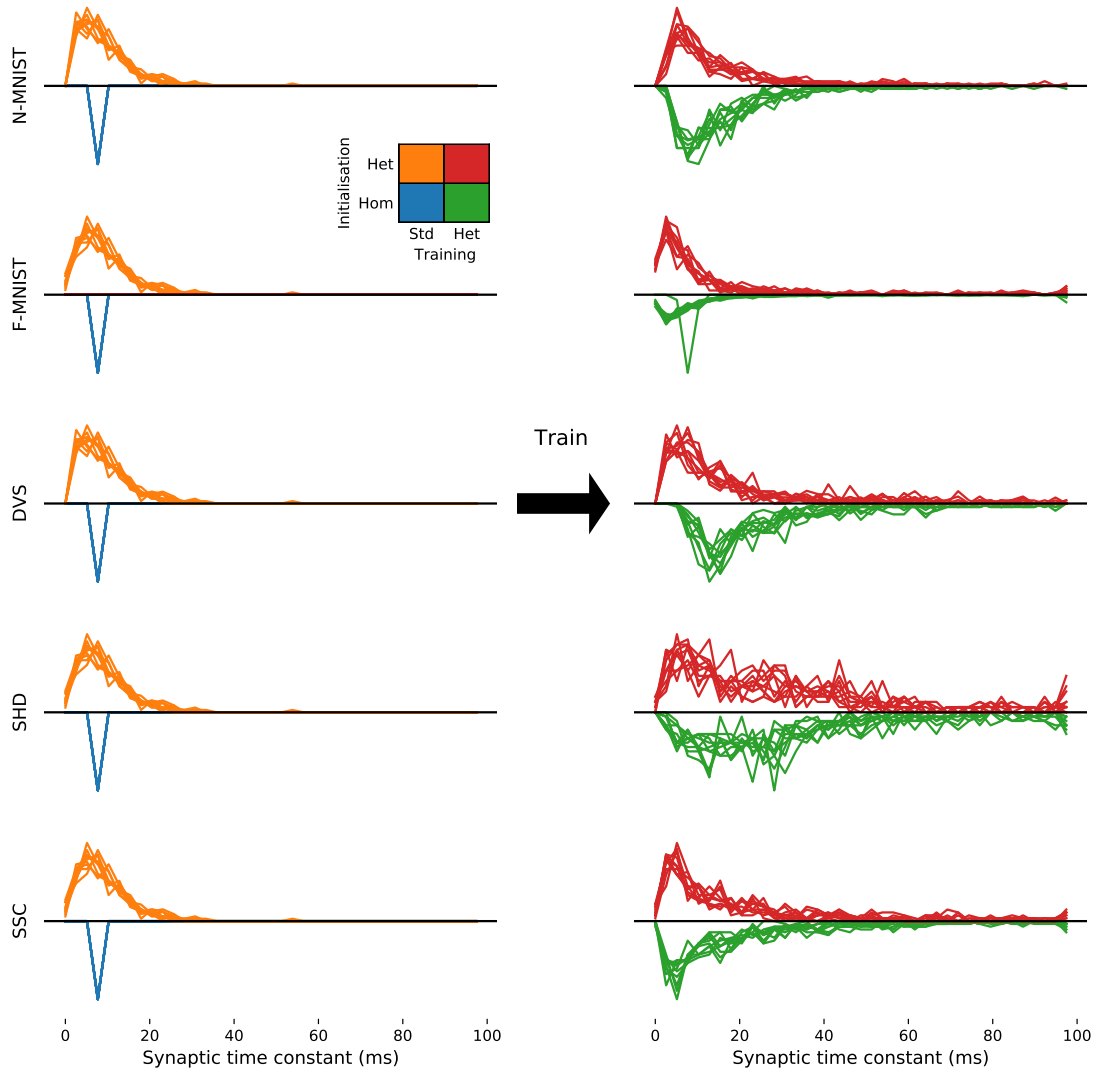

**Supplementary Figure 2:** Breakdown of synaptic time constant distribution for each trial for consistency checking on each dataset.

## 2.3 Confusion matrices DVS-gesture dataset

The classes correspond to

1. Hand clapping
2. Right hand wave
3. Left hand wave
4. Right arm clockwise
5. Right arm counter-clockwise
6. Left arm clockwise
7. Left arm counter-clockwise
8. Arm roll
9. Air drum
10. Air guitar

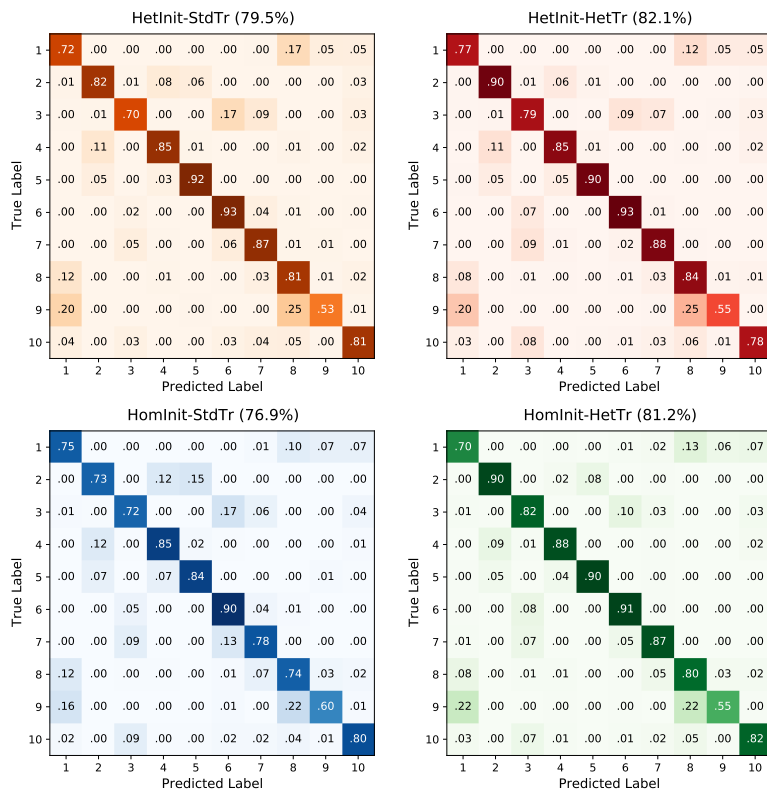

Supplementary Figure 3: Full confusion matrix DVS dataset for each configuration

## 2.4 Grid search of parameters

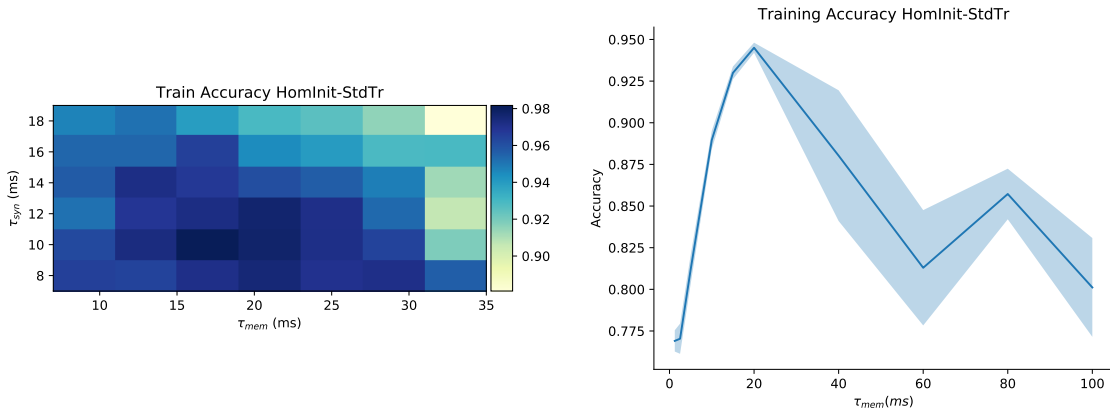

**Supplementary Figure 4:** **A.** Grid search of optimal membrane and synaptic time constants on the SHD dataset for a single trial **B.** Grid search of optimal membrane time constant for the SHD dataset given synaptic time constant is 10ms for 10 trials. Result  $\tau_{syn} = 10ms, \tau_{mem} = 20ms$  which is the same as those time constants used in [1]

## 2.5 All trials Fashion-MNIST

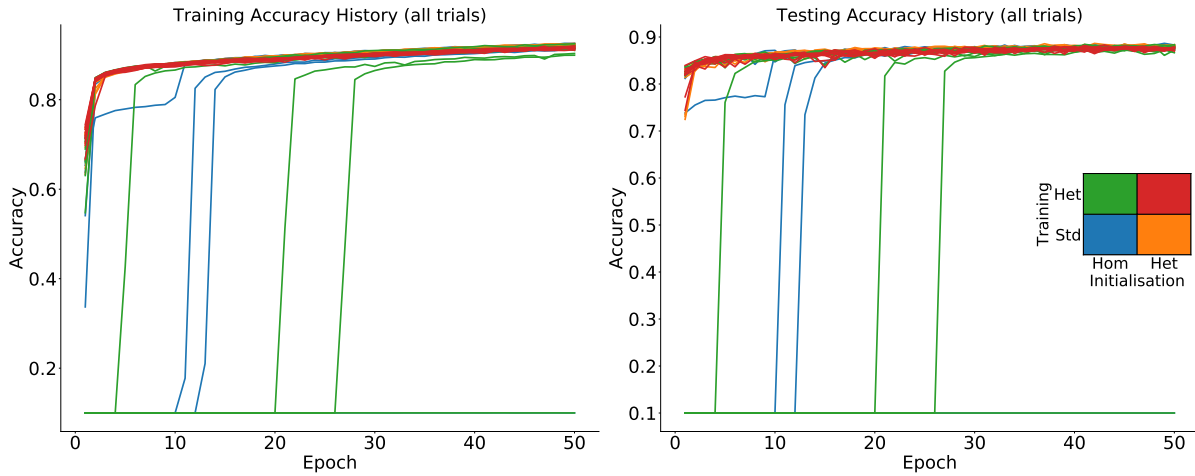

**Supplementary Figure 5:** All individual trials under all four configurations (total of 40). Note how a heterogeneous initialisation results in faster convergence consistently.

## 2.6 Robustness under other time constant distributions

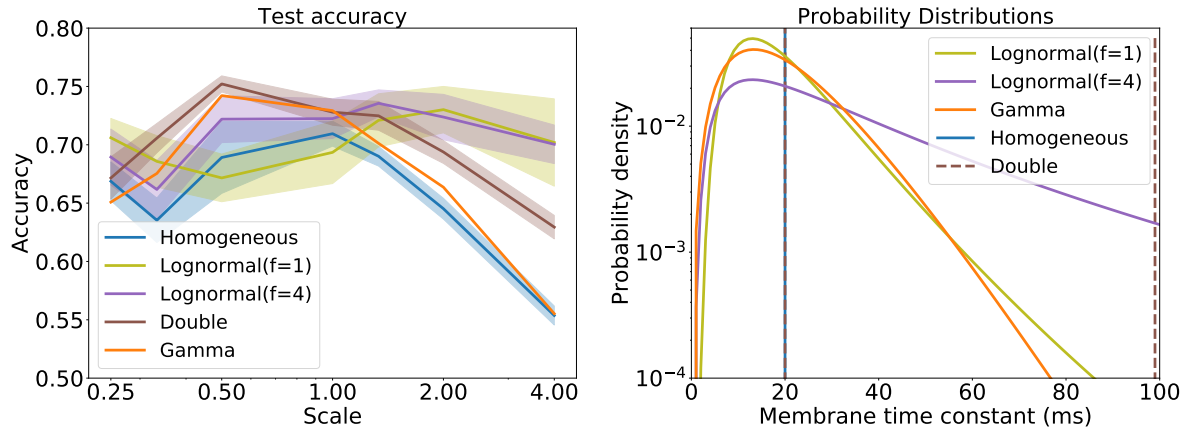

**Supplementary Figure 6: Left:** Test accuracy with standard training and different heterogeneous initialisations for both membrane and synaptic time constants **Right:** Probability distributions for the membrane time constants (Homogeneous, Lognormal, Double (like homogeneous but 5% of the membrane and synaptic time constants are 100ms) and Gamma )

## 2.7 Visualisation of temporal structure of DVS128 gesture dataset samples

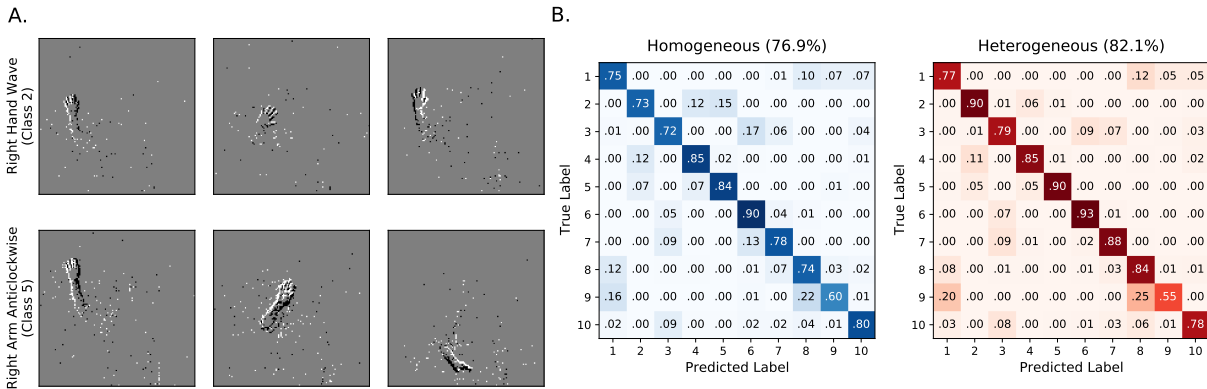

**Supplementary Figure 7: A.** Visualization of two samples of the DVS128 gesture dataset. Each frame spans a 5ms window with 200ms between frames. To distinguish these gestures we need to integrate over tens of milliseconds. **B.** Confusion matrices of the DVS128 gesture dataset under the fully homogeneous (left) and fully heterogeneous (right) configurations. Class 2 (*Right hand wave*) is often incorrectly classified as 4 (*Right hand clockwise*) and 5 (*Right hand counter clockwise*) under the homogeneous configuration but not under the heterogeneous one.



## 2.8 Membrane time constant distribution learned from different initialisation

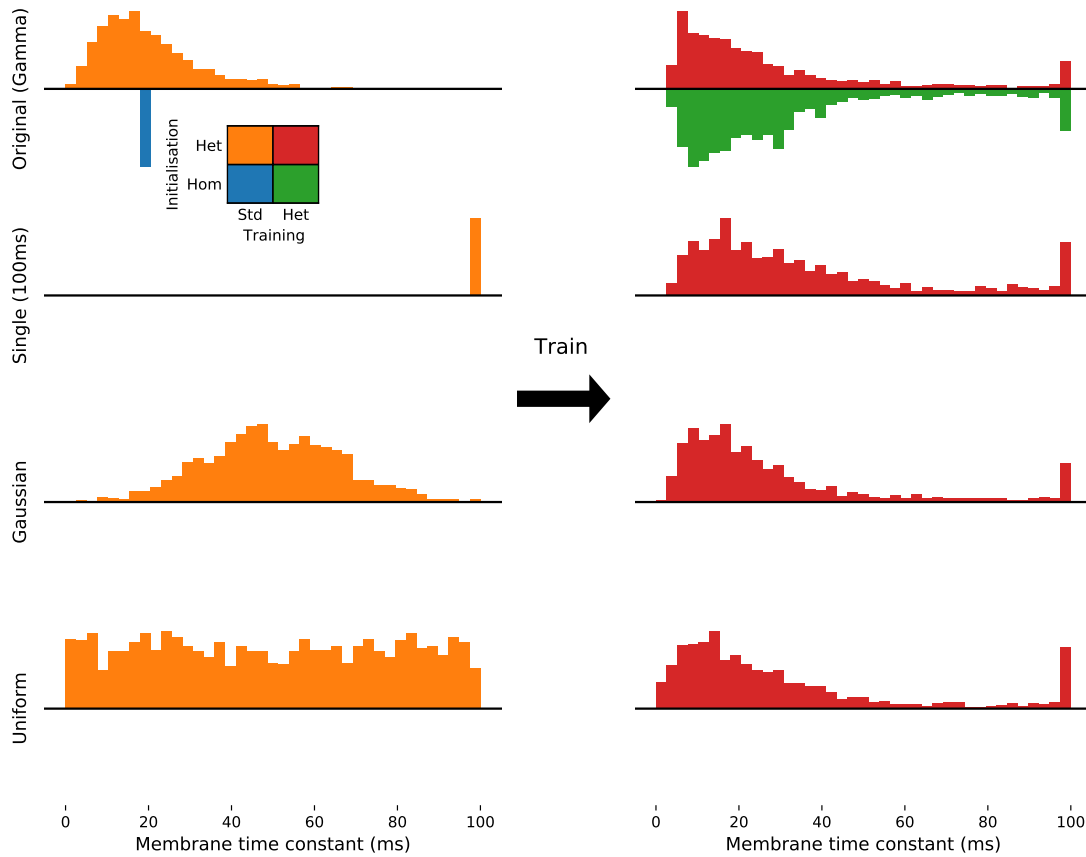

**Supplementary Figure 8:** Membrane time constant distributions before (left) and after (right) training for SHD dataset. Each row represents a different initialisation of the time constants.

## 2.9 Synaptic time constant distribution learned from different initialisation

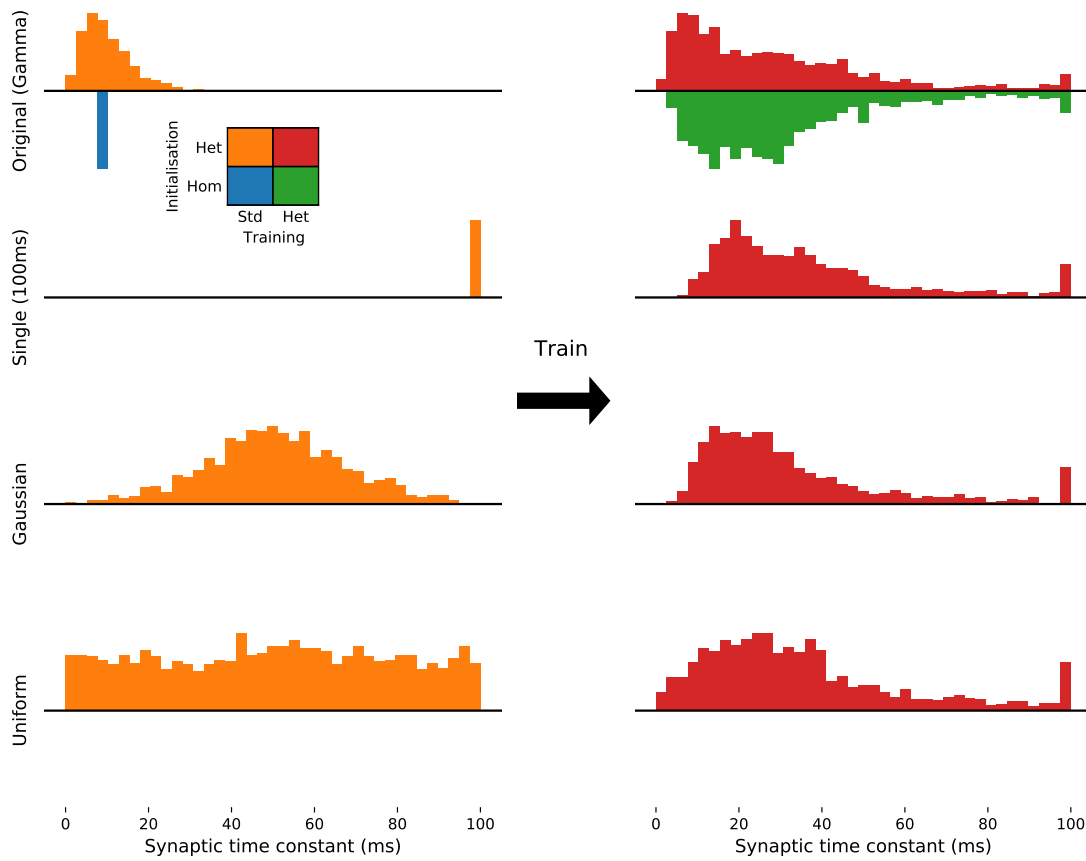

**Supplementary Figure 9:** Synaptic time constant distributions before (left) and after (right) training for SHD dataset. Each row represents a different initialisation of the time constants.

## 2.10 Membrane time constant fitted to Gamma and Log-normal distributions

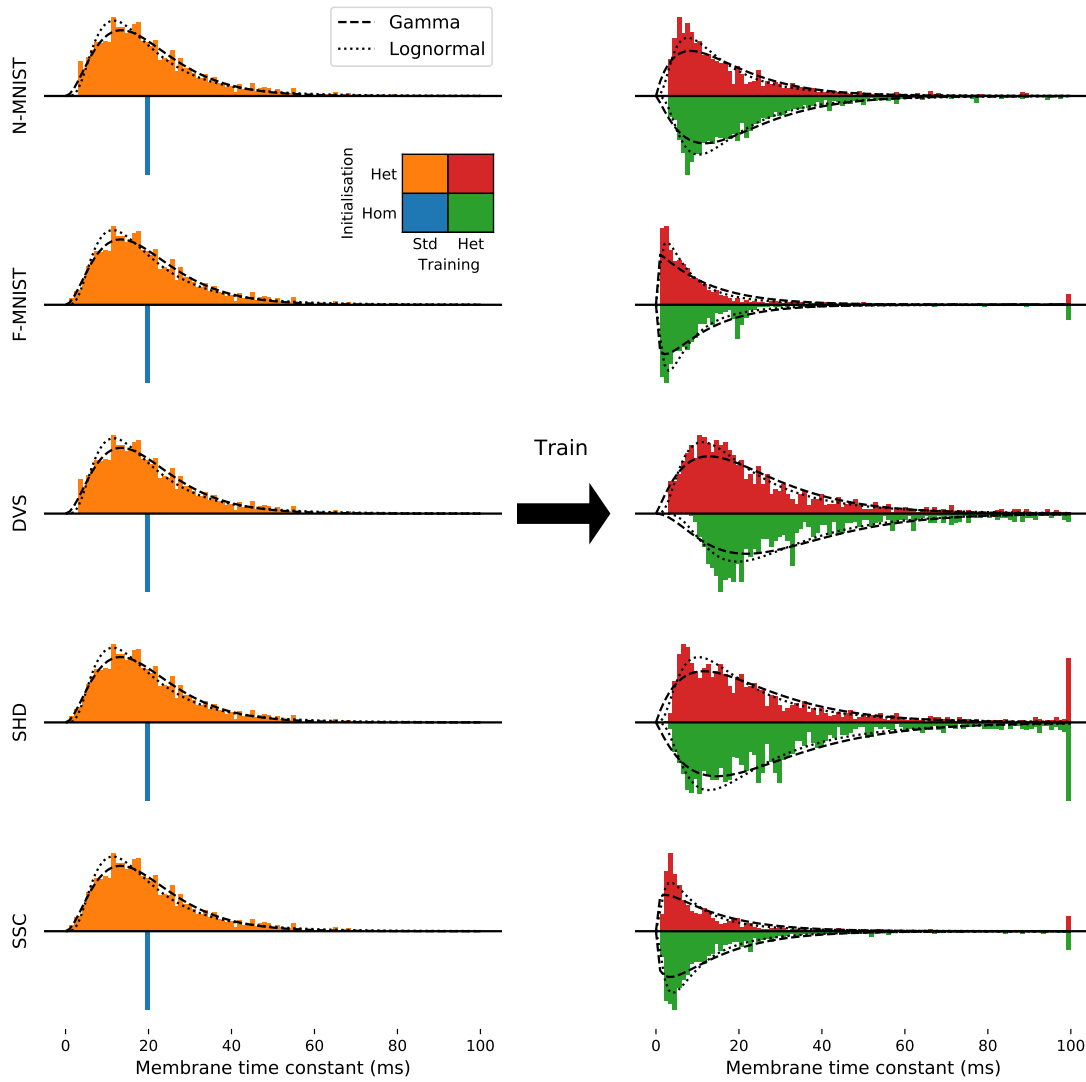

**Supplementary Figure 10:** Membrane time constant distributions before (left) and after (right) training for each dataset. The dashed and the dotted line represents the fitted Gamma and Log-normal distribution respectively.

## 2.11 Synaptic time constant fitted to Gamma and Log-normal distributions

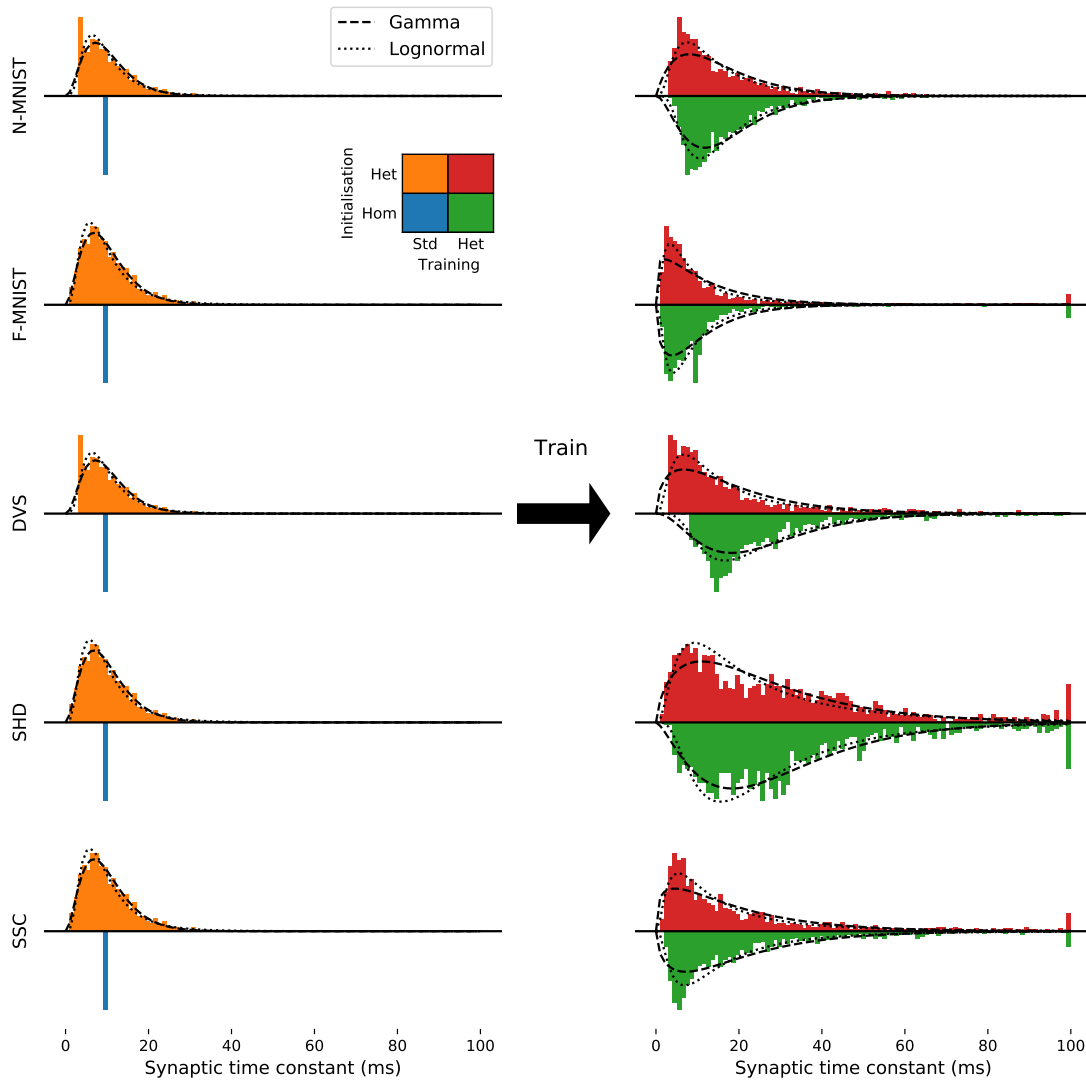

**Supplementary Figure 11:** Synaptic time constant distributions before (left) and after (right) training for each dataset. The dashed and the dotted line represents the fitted Gamma and Log-normal distribution respectively.

## 2.12 Experimentally observed time constant fitted to Gamma and Log-normal distributions

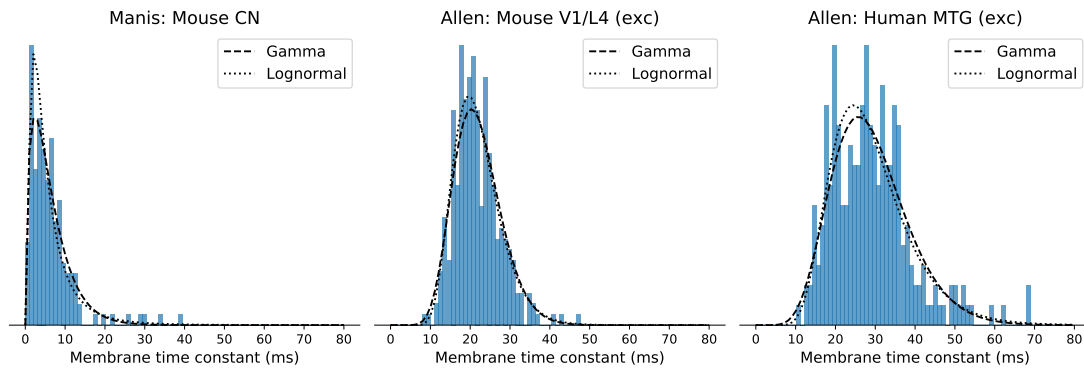

**Supplementary Figure 12:** Experimentally observed distributions of time constants for (left to right): mouse cochlear nucleus, multiple cell types (172 cells)[2, 3]; mouse V1 layer 4, spiny (putatively excitatory) cells (164 cells)[4, 5]; human middle temporal gyrus, spiny cells (236 cells)[4, 5]. The dashed and the dotted line represents the fitted Gamma and Log-normal distribution respectively.

## 2.13 Performance on Augmented SHD dataset

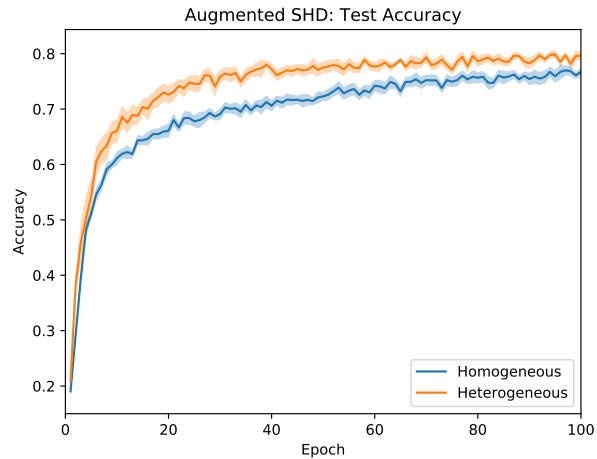

**Supplementary Figure 13:** Test accuracy on augmented SHD dataset consisting of channel compression and channel index noise injection as described in [6], namely adding a spike jitter to the channels by adding a random number  $u \sim \mathcal{N}(0, 20)$  rounded to the nearest integer to the neuron index of every input spike and then merging every 10 neighbouring input channels. Training took place on a homogeneous-training and homogeneous-initialisation configuration (in blue) and on a heterogeneous-training homogeneous-initialisation configuration (in orange).

## Supplementary References

1. Neftci, E. O., Mostafa, H. & Zenke, F. Surrogate Gradient Learning in Spiking Neural Networks: Bringing the Power of Gradient-Based Optimization to Spiking Neural Networks. *IEEE Signal Processing Magazine* **36**, 51–63 (2019).
2. Manis, P. B., Kasten, M. R. & Xie, R. Classification of neurons in the adult mouse cochlear nucleus: Linear discriminant analysis. *PLOS ONE* **14** (ed Malmierca, M. S.) e0223137 (10 2019).
3. Manis, P., Kasten, M. R. & Xie, R. *Raw voltage and current traces for current-voltage (IV) relationships for cochlear nucleus neurons*. 2019.
4. Lein, E. S. *et al.* Genome-wide atlas of gene expression in the adult mouse brain. *Nature* **445**, 168–176 (7124 2007).
5. Hawrylycz, M. J. *et al.* An anatomically comprehensive atlas of the adult human brain transcriptome. *Nature* **489**, 391–399 (7416 2012).
6. Cramer, B., Stradmann, Y., Schemmel, J. & Zenke, F. The heidelberg spiking datasets for the systematic evaluation of spiking neural networks. *IEEE Transactions on Neural Networks and Learning Systems*, 1–14 (2020).
